# Supplementary material for: Monolayer MoSe2/NiO van der Waals heterostructures for infrared light-emitting diodes
Source: Royal Society of Chemistry journal article supplement (doi:10.1039/c9tc04481g), 2019-01-01
Supplement: c9tc04481g1.pdf [file c9tc04481g1.pdf]

## Supporting Information

### Monolayer MoSe<sub>2</sub>/NiO van der waals heterostructure for infrared light-emitting diode

Caiyun Wang, Zhe Kang, Zhi Zheng, Yanan Zhang, Louwen Zhang, Jun Su, Zhi  
Zhang, Nishuang Liu, Luying Li, Yihua Gao\*

\*Corresponding writer: Yihua Gao E-mail: gaoyihua@hust.edu.cn

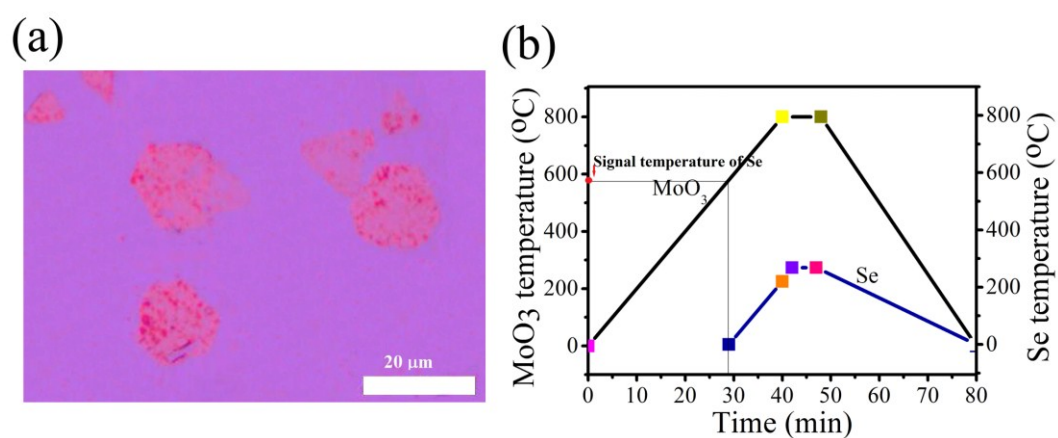

Figure S1. (a) The as-transferred monolayer n-MoSe<sub>2</sub>/p-NiO van der waals heterostructure. (b) The temperature curve of MoO<sub>3</sub> and Se powder in the synthesis process of MoSe<sub>2</sub>.

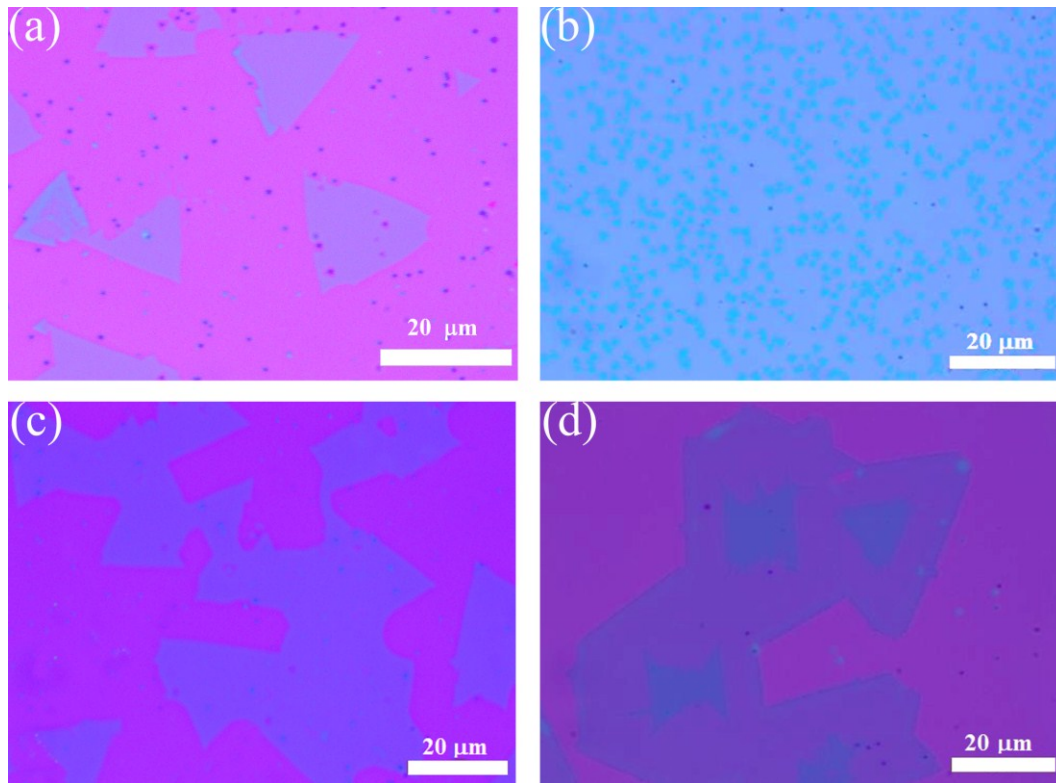

Figure S2. (a) The monolayer MoSe<sub>2</sub> intercalated with pole synthesized at the signal temperature of 560 °C. (b) The monolayer MoSe<sub>2</sub> with large nucleation density synthesized at the signal temperature of 600 °C. (c) The large tract of MoSe<sub>2</sub> monolayer. (d) The large tract of MoSe<sub>2</sub> bilayer.

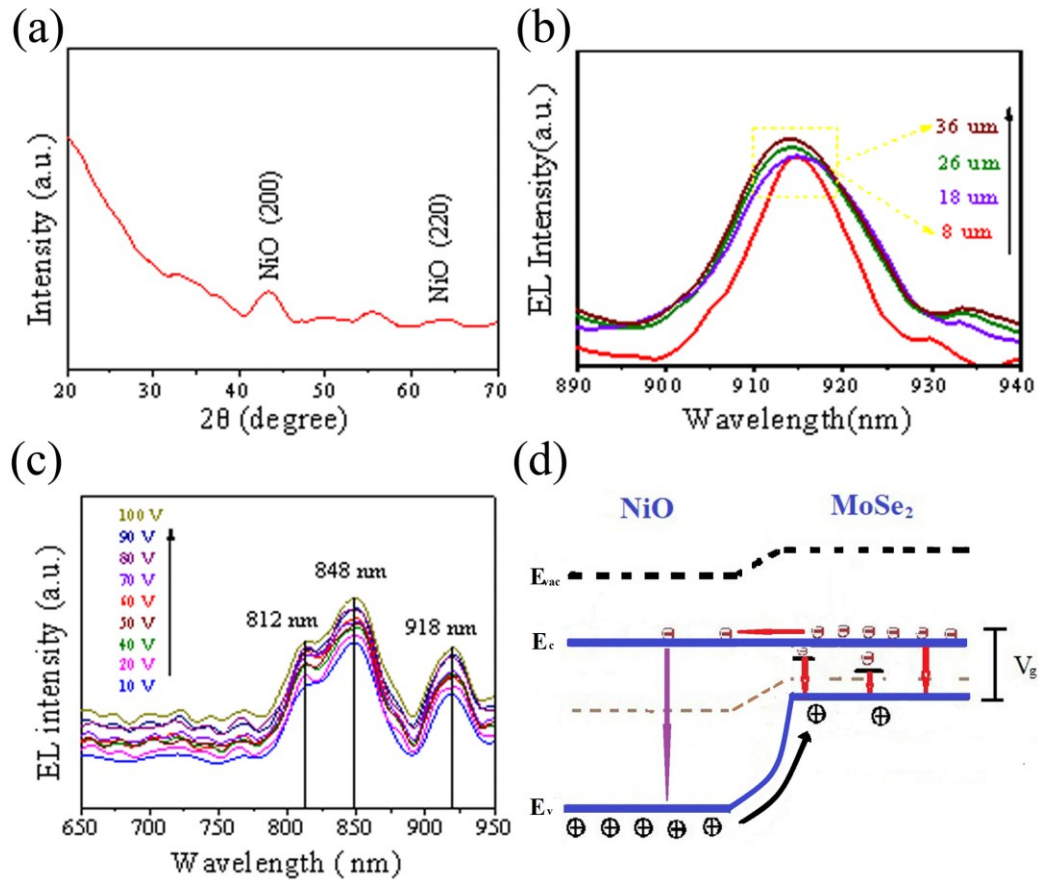

Figure S3. (a) The X-ray diffraction pattern of NiO thin film. (b) The EL peak at 918 nm of monolayer n-MoSe<sub>2</sub>/p-NiO LED changes with relation to the increase of MoSe<sub>2</sub> size. (c) The EL intensity of n-MoSe<sub>2</sub>/p-NiO changes with relation to the increase of positive bias voltage. (d) The energy band diagram of n-MoSe<sub>2</sub>/p-NiO LED under large positive bias.
